# Supplementary material for: Forest management strategy affects saproxylic beetle assemblages: A comparison of even and uneven-aged silviculture using direct and indirect sampling
Source: PubMed Central journal article supplement (PMC5892898; doi:10.1371/journal.pone.0194905), 2018-04-10
Supplement: pone.0194905.s001.pdf [file pone.0194905.s001.pdf]

**S1 Table**

S1 Table. Species list over bark sample species and the matching abundances from window traps. Scientific names follow the Swedish taxonomic database (Dyntaxa version 1.1.6102.24188, 2015)

Feeding guild were determined from previous research (Koch 1989, Palm 1959). F= fungivore, C= cambivore, P= predator.

| Species                  | Family        | Feeding guild | Abundance bark sample |     |     |     |      | ManyGLM output |         | Abundance window traps |     |      |     |      | ManyGLM output |         |
|--------------------------|---------------|---------------|-----------------------|-----|-----|-----|------|----------------|---------|------------------------|-----|------|-----|------|----------------|---------|
|                          |               |               | CC                    | T   | SF  | R   | OG   | t-stat         | p value | CC                     | T   | SF   | R   | OG   | t-stat         | p value |
| Anomognathus cuspidatus  | Staphylinidae | P             | 1                     | 1   | 2   | 2   |      | 3.76           | 0.544   | 8                      | 5   | 6    | 3   | 3    | 2.25           | 0.815   |
| Atrecus longiceps        | Staphylinidae | P             |                       |     |     | 1   |      | 3.17           | 0.32    |                        | 13  | 20   | 14  | 11   | 17.39          | 0.006   |
| Atrecus pilicornis       | Staphylinidae | P             |                       |     |     | 1   |      | 3.17           | 0.324   |                        | 10  | 35   | 57  | 25   | 35.28          | 0.001   |
| Cerylon ferrugineum      | Cerylonidae   | F             |                       |     | 1   |     | 1    | 3.33           | 0.502   | 16                     | 70  | 109  | 137 | 82   | 35.59          | 0.001   |
| Cis jacquemartii         | Ciidae        | F             |                       |     | 1   |     |      | 3.17           | 0.384   | 3                      | 3   | 22   | 12  | 12   | 12.71          | 0.021   |
| Crypturgus hispidulus    | Curculionidae | C             | 1                     | 3   | 1   |     | 5    | 7.36           | 0.188   | 16                     | 93  | 217  | 81  | 173  | 30.90          | 0.001   |
| Curtimorda maculosa      | Mordellidae   | F             | 1                     |     |     |     |      | 2.93           | 0.633   | 167                    |     | 1    |     |      | 35.52          | 0.001   |
| Dadobia immersa          | Staphylinidae | F             | 2                     |     |     |     |      | 3.08           | 0.613   |                        |     |      | 1   | 2    | 3.85           | 0.356   |
| Dinaraea aequata         | Staphylinidae | F             | 1                     |     |     |     | 2    | 3.45           | 0.491   |                        | 3   |      |     |      | 4.37           | 0.127   |
| Dryocoetes alni          | Curculionidae | C             | 1                     |     |     |     |      | 2.93           | 0.584   |                        | 12  | 1    | 1   |      | 14.57          | 0.006   |
| Dryocoetes autographus   | Curculionidae | C             | 1327                  | 884 | 648 | 825 | 1392 | 2.71           | 0.593   | 234                    | 684 | 1573 | 793 | 1392 | 11.75          | 0.02    |
| Homalota plana           | Staphylinidae | F             | 1                     | 1   | 2   | 1   | 3    | 1.40           | 0.904   | 1                      |     |      |     |      | 3.11           | 0.507   |
| Hylastes brunneus        | Curculionidae | C             | 75                    | 210 | 72  | 159 | 86   | 9.46           | 0.177   | 35                     | 83  | 74   | 34  | 57   | 6.23           | 0.34    |
| Hylastes cunicularius    | Curculionidae | C             | 1                     | 5   | 130 | 74  | 187  | 14.86          | 0.028   | 9                      | 17  | 41   | 35  | 39   | 6.41           | 0.197   |
| Hylobius abietis         | Curculionidae | C             | 1                     |     |     |     |      | 2.93           | 0.564   | 2                      |     |      |     |      | 6.23           | 0.102   |
| Hylobius excavatus       | Curculionidae | C             |                       |     | 1   |     |      | 3.17           | 0.396   |                        |     |      | 1   |      | 3.12           | 0.447   |
| Hylobius pinastri        | Curculionidae | C             | 3                     |     |     |     |      | 6.38           | 0.102   | 2                      |     | 1    |     |      | 5.29           | 0.215   |
| Hylurgops palliatus      | Curculionidae | C             |                       | 1   | 4   | 16  | 3    | 9.39           | 0.126   |                        |     |      | 1   |      | 3.12           | 0.415   |
| Leptusa pulchella        | Staphylinidae | F             | 26                    | 62  | 63  | 138 | 105  | 23.53          | 0.001   | 3                      | 7   | 7    | 12  | 5    | 4.88           | 0.394   |
| Orthotomicus suturalis   | Curculionidae | C             | 102                   |     |     |     |      | 16.79          | 0.003   | 1                      |     |      |     |      | 3.12           | 0.512   |
| Pissodes glylhenhalii    | Curculionidae | C             | 3                     | 15  | 51  | 57  | 52   | 7.79           | 0.142   | 1                      |     |      |     |      | 3.12           | 0.512   |
| Pityogenes chalcographus | Curculionidae | C             | 33                    |     |     |     | 2    | 9.23           | 0.055   | 169                    | 91  | 89   | 8   | 46   | 13.04          | 0.072   |
| Polygraphus subopacus    | Curculionidae | C             |                       | 2   |     |     |      | 8.22           | 0.017   |                        | 11  | 14   | 8   | 90   | 14.28          | 0.067   |
| Pteryx suturalis         | Ptiliidae     | F             |                       | 2   |     | 1   |      | 4.50           | 0.223   | 121                    | 120 | 350  | 256 | 248  | 4.21           | 0.252   |
| Quedius plagiatus        | Staphylinidae | P             |                       |     |     | 1   |      | 3.17           | 0.324   | 3                      | 18  | 29   | 26  | 20   | 8.88           | 0.065   |
| Rhagium inquisitor       | Cerambycidae  | C             | 1                     |     |     |     |      | 2.93           | 0.598   | 1                      |     | 2    |     | 1    | 2.89           | 0.832   |
| Rhyncolus ater           | Curculionidae | C             |                       |     | 2   |     | 1    | 3.77           | 0.401   |                        | 2   | 1    |     | 1    | 5.79           | 0.211   |
| Xylechinus pilosus       | Curculionidae | C             |                       | 3   | 2   | 7   | 1    | 8.67           | 0.114   |                        |     | 6    | 3   | 5    | 12.42          | 0.019   |
