# Supplementary material for: Forest management strategy affects saproxylic beetle assemblages: A comparison of even and uneven-aged silviculture using direct and indirect sampling
Source: PubMed Central journal article supplement (PMC5892898; doi:10.1371/journal.pone.0194905), 2018-04-10
Supplement: pone.0194905.s002.pdf [file pone.0194905.s002.pdf]

## S2 Table

S2 Table. Species list from window traps. Scientific names follow the Swedish taxonomic database (Dyntaxa version 1.1.6102.24188, 2015)

Feeding guild were determined from previous research (Koch 1989, Palm 1959). F= fungivore, C= cambivore, P= predator, W=wood-borer.

Decay niches are adapted from Thorn et. al 2014

| Species                         | Family         | Decay niche | Feeding guild | Clearcut | Thinning | Selective | Reference | Old-growth |
|---------------------------------|----------------|-------------|---------------|----------|----------|-----------|-----------|------------|
| <i>Abdera affinis</i>           | Melandryidae   | 3,3         | F             | 2        |          |           |           |            |
| <i>Abdera flexuosa</i>          | Melandryidae   | 3,3         | F             | 1        |          | 2         |           |            |
| <i>Alosterna tabacicolor</i>    | Cerambycidae   | 3,6         | W             |          | 1        | 4         |           |            |
| <i>Ampedus balteatus</i>        | Elateridae     | 3,4         | P             | 26       |          |           |           |            |
| <i>Ampedus nigrinus</i>         | Elateridae     | 3,7         | P             | 129      | 8        | 1         | 9         | 3          |
| <i>Ampedus pomonae</i>          | Elateridae     | 3,5         | P             | 2        |          |           |           |            |
| <i>Ampedus tristis</i>          | Elateridae     | 3,4         | P             | 309      |          | 3         | 1         |            |
| <i>Anaspis bohémica</i>         | Scraptiidae    | 4,0         | P             | 13       | 2        |           |           | 1          |
| <i>Anaspis rufilabris</i>       | Scraptiidae    | 4,0         | P             | 1        | 2        | 3         | 1         | 5          |
| <i>Anaspis thoracica</i>        | Scraptiidae    | 4,0         | F             | 1        |          |           |           |            |
| <i>Anastrangalia reyi</i>       | Cerambycidae   | 3,0         | W             | 3        |          |           |           |            |
| <i>Anisotoma axillaris</i>      | Leiodidae      | 4,0         | F             | 72       |          | 4         | 1         | 1          |
| <i>Anisotoma castanea</i>       | Leiodidae      | 4,0         | F             | 5        |          | 1         | 2         | 1          |
| <i>Anisotoma glabra</i>         | Leiodidae      | 4,0         | F             | 53       | 13       | 14        | 5         | 8          |
| <i>Anisotoma humeralis</i>      | Leiodidae      | 4,0         | F             | 3        | 3        | 8         | 4         | 10         |
| <i>Anisotoma orbicularis</i>    | Leiodidae      | 4,0         | F             | 13       | 1        | 4         | 3         | 1          |
| <i>Anomognathus cuspidatus</i>  | Staphylinidae  | 2,8         | P             | 8        | 5        | 6         | 3         | 3          |
| <i>Anthaxia quadripunctata</i>  | Buprestidae    | 1,8         | C             | 13       |          |           |           |            |
| <i>Aplocnemus tarsalis</i>      | Melyridae      | 2,5         | P             | 2        |          |           |           |            |
| <i>Arhopalus rusticus</i>       | Cerambycidae   | 2,5         | C             | 1        |          |           |           |            |
| <i>Atomaria bella</i>           | Cryptophagidae | 3,0         | F             | 14       | 18       | 28        | 17        | 61         |
| <i>Atomaria vespertina</i>      | Cryptophagidae |             | F             |          | 4        |           | 8         | 28         |
| <i>Atreclus affinis</i>         | Staphylinidae  | 4,0         | P             |          | 2        |           |           |            |
| <i>Atreclus longiceps</i>       | Staphylinidae  | 3,5         | P             |          | 13       | 20        | 14        | 11         |
| <i>Atreclus pilicornis</i>      | Staphylinidae  | 2,0         | P             |          | 10       | 35        | 57        | 25         |
| <i>Bibloporus bicolor</i>       | Staphylinidae  | 3,4         | P             | 37       | 57       | 97        | 74        | 48         |
| <i>Bolitochara mulsanti</i>     | Staphylinidae  | 3,5         | F             |          | 1        |           |           | 3          |
| <i>Bolitophagus reticulatus</i> | Tenebrionidae  | 3,3         | F             | 4        |          |           |           |            |
| <i>Cacotemnus rufipes</i>       | Anobiidae      |             | W             |          |          |           |           | 1          |
| <i>Callidium coriaceum</i>      | Cerambycidae   | 2,0         | C             | 2        |          |           |           |            |
| <i>Calopus serraticornis</i>    | Oedemeridae    | 3,4         | W             | 1        | 1        |           | 1         |            |
| <i>Cerylon deplanatum</i>       | Cerylonidae    | 2,0         | F             |          | 4        | 2         |           |            |
| <i>Cerylon ferrugineum</i>      | Cerylonidae    | 2,4         | F             | 16       | 70       | 109       | 137       | 82         |
| <i>Cerylon histerooides</i>     | Cerylonidae    | 3,7         | F             | 78       | 87       | 130       | 110       | 144        |
| <i>Chrysanthia geniculata</i>   | Oedemeridae    |             | W             | 5        |          |           |           |            |
| <i>Cis bidentatus</i>           | Ciidae         | 3,4         | F             |          | 1        | 6         | 3         | 13         |
| <i>Cis boleti</i>               | Ciidae         | 3,4         | F             | 212      | 15       | 26        | 12        | 17         |
| <i>Cis castaneus</i>            | Ciidae         | 3,4         | F             |          | 1        | 3         | 1         | 4          |
| <i>Cis comptus</i>              | Ciidae         | 3,3         | F             | 29       | 6        | 11        | 4         | 3          |
| <i>Cis dentatus</i>             | Ciidae         | 3,3         | F             | 2        | 4        | 4         | 4         | 17         |
| <i>Cis festivus</i>             | Ciidae         |             | F             |          | 1        | 2         |           |            |
| <i>Cis glabratus</i>            | Ciidae         | 3,3         | F             |          | 2        | 3         |           |            |
| <i>Cis jacquemartii</i>         | Ciidae         | 3,3         | F             | 3        | 3        | 22        | 12        | 12         |
| <i>Cis lineatocribratus</i>     | Ciidae         | 3,4         | F             | 1        | 1        | 1         |           |            |
| <i>Cis micans</i>               | Ciidae         | 3,3         | F             |          | 7        | 5         | 1         | 3          |
| <i>Cis punctulatus</i>          | Ciidae         | 3,3         | F             | 7        | 3        | 10        |           | 6          |
| <i>Cis quadridens</i>           | Ciidae         | 3,3         | F             |          | 1        |           |           | 1          |
| <i>Cis submicans</i>            | Ciidae         |             | F             |          | 1        |           |           |            |
| <i>Cis vestitus</i>             | Ciidae         |             | F             | 4        | 2        | 1         | 1         | 5          |
| <i>Corticaria lapponica</i>     | Corticariidae  | 3,0         | F             |          | 2        | 3         |           |            |
| <i>Corticeus linearis</i>       | Tenebrionidae  | 1,0         | P             | 3        |          |           |           |            |

|                                       |                |     |     |     |     |      |     |      |
|---------------------------------------|----------------|-----|-----|-----|-----|------|-----|------|
| <i>Cryphalus saltuarius</i>           | Curculionidae  | 2,0 | C   |     | 1   | 1    |     |      |
| <i>Cryptolestes abietis</i>           | Laemophloeidae | 2,0 | P   |     | 1   | 2    | 1   | 2    |
| <i>Cryptophagus quadrihamatus</i>     | Cryptophagidae |     | F   |     |     |      |     | 1    |
| <i>Cryptophagus quercinus</i>         | Cryptophagidae | 4,1 | F   |     | 1   |      |     |      |
| <i>Crypturgus cinereus</i>            | Curculionidae  | 2,0 | C   | 10  | 11  | 62   | 15  | 504  |
| <i>Crypturgus hispidulus</i>          | Curculionidae  | 2,0 | C   | 16  | 93  | 217  | 81  | 173  |
| <i>Curtimorda maculosa</i>            | Mordellidae    | 3,5 | F   | 167 |     | 1    |     |      |
| <i>Dacne bipustulata</i>              | Erotylidae     | 3,2 | F   | 63  |     |      | 2   | 1    |
| <i>Dadobia immersa</i>                | Staphylinidae  | 2,5 | F   |     |     |      | 1   | 2    |
| <i>Danosoma conspersum</i>            | Elateridae     |     | P   | 2   |     |      |     |      |
| <i>Danosoma fasciatum</i>             | Elateridae     |     | P   | 30  |     |      |     |      |
| <i>Dasytes niger</i>                  | Melyridae      | 3,2 | P   | 60  |     |      |     |      |
| <i>Dasytes obscurus</i>               | Melyridae      | 3,2 | P   | 2   |     |      |     |      |
| <i>Dasytes plumbeus</i>               | Melyridae      | 3,2 | P   |     |     |      |     | 1    |
| <i>Dendroctonus micans</i>            | Curculionidae  | 2,0 | C   |     | 1   | 1    | 1   |      |
| <i>Dendrophagus crenatus</i>          | Silvanidae     | 2,5 | F   | 4   | 14  | 15   | 23  | 26   |
| <i>Denticollis borealis (NT)</i>      | Elateridae     | 3,7 | P   | 2   |     |      |     |      |
| <i>Denticollis linearis</i>           | Elateridae     | 3,4 | P   | 6   | 4   | 8    | 1   | 1    |
| <i>Diacanthous undulatus</i>          | Elateridae     | 3,4 | P   | 1   | 1   |      | 1   | 1    |
| <i>Dictyoptera aurora</i>             | Lycidae        |     | P   | 8   | 10  | 23   | 17  | 24   |
| <i>Dinaraea aequata</i>               | Staphylinidae  | 3,5 | F   |     | 3   |      |     |      |
| <i>Dinaraea arcana</i>                | Staphylinidae  | 3,3 | F   |     | 2   | 4    | 3   |      |
| <i>Dinaraea linearis</i>              | Staphylinidae  | 3,5 | F   |     |     |      |     | 1    |
| <i>Dolichocis laricinus</i>           | Ciidae         |     | F   |     | 1   |      |     | 2    |
| <i>Dorcatoma dresdensis</i>           | Anobiidae      | 3,3 | F   | 9   | 1   | 1    | 2   | 1    |
| <i>Dorcatoma robusta</i>              | Anobiidae      | 3,3 | F   | 3   | 1   | 1    |     |      |
| <i>Dropephylla clavigera</i>          | Staphylinidae  |     | P   | 1   |     |      |     |      |
| <i>Dropephylla linearis</i>           | Staphylinidae  |     | F,P | 3   | 3   | 5    | 2   | 7    |
| <i>Dryocoetes alni</i>                | Curculionidae  | 2,0 | C   |     | 12  | 1    | 1   |      |
| <i>Dryocoetes autographus</i>         | Curculionidae  | 2,0 | C   | 234 | 684 | 1573 | 793 | 1392 |
| <i>Eblisia minor (NT)</i>             | Histeridae     | 3,5 | P   | 5   |     |      |     |      |
| <i>Elateroides dermestoides</i>       | Lymexylidae    |     | F   | 8   | 3   | 29   | 16  | 8    |
| <i>Endomychus coccineus</i>           | Endomychidae   | 3,4 | F   |     |     | 4    | 1   | 2    |
| <i>Enicmus apicalis</i>               | Corticariidae  |     | F   |     |     | 1    | 3   | 1    |
| <i>Enicmus planipennis (NT)</i>       | Corticariidae  | 3,5 | F   |     |     |      |     | 1    |
| <i>Enicmus rugosus</i>                | Corticariidae  | 3,9 | F   | 56  | 47  | 57   | 28  | 36   |
| <i>Enicmus testaceus</i>              | Corticariidae  | 3,0 | F   |     | 3   | 1    |     |      |
| <i>Ennearthron cornutum</i>           | Ciidae         | 3,4 | F   | 3   |     | 9    | 1   |      |
| <i>Episernus angulicollis</i>         | Anobiidae      | 2,5 | W   | 1   |     | 2    | 1   |      |
| <i>Euedectus giraudi</i>              | Staphylinidae  |     | F   |     | 23  | 13   | 17  | 5    |
| <i>Euplectus punctatus</i>            | Staphylinidae  | 3,0 | P   | 46  | 31  | 48   | 41  | 47   |
| <i>Glischrochilus quadripunctatus</i> | Nitidulidae    | 2,0 | F,P | 10  | 5   | 10   | 2   | 1    |
| <i>Globicornis emarginata</i>         | Dermestidae    |     | D   | 6   |     |      |     |      |
| <i>Gnathacmaeops pratensis</i>        | Cerambycidae   |     | C   | 1   |     |      |     |      |
| <i>Gyrophaena boleti</i>              | Staphylinidae  | 3,3 | F   | 5   | 3   | 3    | 4   | 4    |
| <i>Gyrophaena minima</i>              | Staphylinidae  | 3,7 | F   |     |     | 1    |     |      |
| <i>Hadreule elongatula</i>            | Ciidae         |     | F   | 7   |     | 1    |     | 1    |
| <i>Hadrobregmus pertinax</i>          | Anobiidae      |     | C   | 36  | 1   | 1    | 1   | 2    |
| <i>Hallomenus axillaris</i>           | Melandryidae   | 3,0 | F   | 1   | 2   | 5    | 1   | 3    |
| <i>Hallomenus binotatus</i>           | Melandryidae   | 3,4 | F   | 3   | 15  | 20   | 11  | 23   |
| <i>Homalota plana</i>                 | Staphylinidae  | 1,5 | F   | 1   |     |      |     |      |
| <i>Hylastes brunneus</i>              | Curculionidae  | 2,0 | C   | 35  | 83  | 74   | 34  | 57   |
| <i>Hylastes cunicularius</i>          | Curculionidae  | 2,0 | C   | 9   | 17  | 41   | 35  | 39   |
| <i>Hylobius abietis</i>               | Curculionidae  | 2,0 | C   | 2   |     |      |     |      |
| <i>Hylobius excavatus</i>             | Curculionidae  |     | C   |     |     |      | 1   |      |
| <i>Hylobius pinastri</i>              | Curculionidae  | 2,0 | C   | 2   |     | 1    |     |      |
| <i>Hylurgops palliatus</i>            | Curculionidae  | 2,0 | C   |     |     |      | 1   |      |
| <i>Ips typographus</i>                | Curculionidae  | 1,8 | C   | 3   | 10  | 30   | 2   | 7    |

|                                      |                |     |     |     |    |    |    |     |
|--------------------------------------|----------------|-----|-----|-----|----|----|----|-----|
| <i>Judolia sexmaculata</i>           | Cerambycidae   | 3,4 | C   | 26  | 3  | 4  |    |     |
| <i>Latridius hirtus</i>              | Corticariidae  | 4,0 | F   | 5   | 3  | 5  | 3  | 7   |
| <i>Leptophloeus alternans</i>        | Laemophloeidae | 2,0 | P   |     |    | 1  |    |     |
| <i>Leptura quadrifasciata</i>        | Cerambycidae   | 3,3 | W   | 7   |    |    |    |     |
| <i>Lepturobosca virens</i>           | Cerambycidae   | 2,0 | W   | 1   |    |    |    |     |
| <i>Leptusa pulchella</i>             | Staphylinidae  | 3,8 | F   | 3   | 7  | 7  | 12 | 5   |
| <i>Litargus connexus</i>             | Mycetophagidae | 2,8 | F   | 3   |    |    |    |     |
| <i>Lordithon speciosus</i>           | Staphylinidae  | 3,7 | P   |     | 7  | 7  | 11 | 9   |
| <i>Lordithon trimaculatus</i>        | Staphylinidae  | 3,7 | P   |     | 1  |    | 1  |     |
| <i>Magdalis frontalis</i>            | Curculionidae  | 2,0 | W   | 1   |    |    |    |     |
| <i>Malthinus biguttatus</i>          | Cantharidae    | 3,2 | P   |     | 1  | 1  |    |     |
| <i>Malthodes fuscus</i>              | Cantharidae    | 3,2 | P   | 1   | 1  |    |    | 2   |
| <i>Melanotus castanipes</i>          | Elateridae     | 3,7 | p   | 48  | 28 | 33 | 9  | 17  |
| <i>Melanotus villosus</i>            | Elateridae     |     |     | 17  | 14 | 10 | 1  | 6   |
| <i>Microscydmus minimus</i>          | Scydmaenidae   | 4,5 | P   | 5   |    | 8  | 9  | 1   |
| <i>Molorchus minor</i>               | Cerambycidae   | 2,0 | C   | 3   |    | 4  |    |     |
| <i>Mordella aculeata</i>             | Mordellidae    | 3,0 | F   | 2   |    |    |    |     |
| <i>Mycetochara maura</i>             | Tenebrionidae  |     | F   |     | 1  |    | 1  |     |
| <i>Mycetochara obscura</i>           | Tenebrionidae  | 4,1 | ?   | 1   | 1  |    |    |     |
| <i>Mycetophagus fulvicollis (NT)</i> | Mycetophagidae | 3,8 | F   | 2   | 1  |    |    |     |
| <i>Mycetophagus multipunctatus</i>   | Mycetophagidae | 3,5 | F   | 2   | 1  | 1  |    |     |
| <i>Mycetophagus populi</i>           | Mycetophagidae | 3,6 | F   |     |    |    |    | 1   |
| <i>Octotemnus glabriculus</i>        | Ciidae         | 3,4 | F   | 1   | 1  | 4  | 1  | 1   |
| <i>Olisthaerus megacephalus</i>      | Staphylinidae  |     | P   |     |    | 1  |    |     |
| <i>Orchesia fasciata (NT)</i>        | Melandryidae   | 3,4 | F   |     |    | 4  |    | 3   |
| <i>Orchesia micans</i>               | Melandryidae   | 3,3 | F   |     | 1  | 2  |    | 3   |
| <i>Orthocis alni</i>                 | Ciidae         | 2,8 | F   | 6   | 2  | 9  | 6  | 4   |
| <i>Orthotomicus laricis</i>          | Curculionidae  | 2,0 | C   | 1   |    | 1  |    | 1   |
| <i>Orthotomicus suturalis</i>        | Curculionidae  | 2,0 | C   | 1   |    |    |    |     |
| <i>Oxymirus cursor</i>               | Cerambycidae   | 3,6 | W   | 1   |    |    | 1  | 1   |
| <i>Pachyta lamed</i>                 | Cerambycidae   | 2,5 | C   | 1   |    |    |    |     |
| <i>Pediacus fuscus</i>               | Cucujidae      | 2,0 | F   | 1   |    |    |    | 1   |
| <i>Peltis ferruginea</i>             | Trogossitidae  |     | F   | 3   | 1  | 4  | 1  | 3   |
| <i>Phloeonomus punctipennis</i>      | Staphylinidae  | 2,5 | P   |     | 2  | 6  | 1  | 2   |
| <i>Phloeopora testacea</i>           | Staphylinidae  | 2,3 | P   | 1   |    |    |    |     |
| <i>Phloeostiba lapponica</i>         | Staphylinidae  |     | P   | 9   |    | 4  | 1  |     |
| <i>Phloeotribus spinulosus</i>       | Curculionidae  |     | C   | 3   | 7  | 3  | 13 | 13  |
| <i>Phyllodrepa melanocephala</i>     | Staphylinidae  | 4,0 | F,P | 2   |    |    |    | 2   |
| <i>Pissodes gyllenhalii</i>          | Curculionidae  | 2,0 | C   | 1   |    |    |    |     |
| <i>Pissodes harcyniae</i>            | Curculionidae  | 2,0 | C   |     |    | 1  |    | 3   |
| <i>Pissodes pini</i>                 | Curculionidae  | 2,0 | C   | 1   |    |    |    |     |
| <i>Pityogenes bidentatus</i>         | Curculionidae  | 2,0 | C   | 4   | 2  |    | 1  |     |
| <i>Pityogenes chalcographus</i>      | Curculionidae  | 1,8 | C   | 169 | 91 | 89 | 8  | 46  |
| <i>Pityogenes quadridens</i>         | Curculionidae  | 2,0 | C   | 2   |    |    |    |     |
| <i>Pityophagus ferrugineus</i>       | Nitidulidae    | 2,0 | P   | 2   | 8  | 1  | 1  | 3   |
| <i>Pityophthorus micrographus</i>    | Curculionidae  | 2,0 | C   |     | 1  |    |    | 1   |
| <i>Placusa atrata</i>                | Staphylinidae  | 1,6 | P   | 1   |    |    |    |     |
| <i>Platycerus caprea</i>             | Lucanidae      | 3,4 | W   | 2   |    | 1  |    |     |
| <i>Platycis minutus</i>              | Lycidae        | 4,0 | P   |     |    | 3  | 1  | 3   |
| <i>Platysoma angustatum</i>          | Histeridae     | 2,0 | P   | 1   |    |    |    |     |
| <i>Platysoma lineare (NT)</i>        | Histeridae     | 2,0 | P   | 1   |    |    |    |     |
| <i>Plegaderus vulneratus</i>         | Histeridae     | 2,0 | P   | 3   | 1  | 3  |    | 3   |
| <i>Podistra schoenherri</i>          | Cantharidae    |     | P   | 17  | 4  | 19 | 10 | 3   |
| <i>Pogonocherus fasciculatus</i>     | Cerambycidae   | 2,0 | C   | 7   |    | 1  | 1  | 1   |
| <i>Polygraphus poligraphus</i>       | Curculionidae  | 2,0 | C   | 4   | 59 | 91 | 64 | 116 |
| <i>Polygraphus punctifrons</i>       | Curculionidae  | 2,0 | C   |     |    |    |    | 8   |
| <i>Polygraphus subopacus</i>         | Curculionidae  | 2,0 | C   |     | 11 | 14 | 8  | 90  |
| <i>Pteryngium crenatum</i>           | Cryptophagidae | 3,0 | F   |     | 2  | 9  | 8  | 6   |

|                                   |                  |     |     |     |     |     |     |     |
|-----------------------------------|------------------|-----|-----|-----|-----|-----|-----|-----|
| <i>Pteryx suturalis</i>           | Ptiliidae        | 4,1 | F   | 121 | 120 | 350 | 256 | 248 |
| <i>Ptilinus fuscus</i>            | Anobiidae        | 3,0 | W   | 1   |     |     |     |     |
| <i>Ptinella johnsoni</i>          | Ptiliidae        | 3,4 | F   |     |     | 2   |     |     |
| <i>Ptinella tenella</i>           | Ptiliidae        | 4,0 | F   | 1   |     | 2   |     |     |
| <i>Ptinus subpillosus</i>         | Anobiidae        |     | C   |     | 1   | 5   | 3   | 7   |
| <i>Pyropterus nigroruber</i>      | Lycidae          | 4,0 | P   | 4   |     | 4   | 2   |     |
| <i>Pytho abieticola</i> (VU)      | Pythidea         | 3,0 | P   |     |     | 1   |     |     |
| <i>Quedius plagiatus</i>          | Staphylinidae    | 4,0 | P   | 3   | 18  | 29  | 26  | 20  |
| <i>Rabocerus foveolatus</i>       | Salpingidae      | 2,0 | P   | 5   | 2   | 1   |     | 1   |
| <i>Rhagium inquisitor</i>         | Cerambycidae     | 2,4 | C   | 1   |     | 2   |     | 1   |
| <i>Rhagium mordax</i>             | Cerambycidae     | 2,3 | C   |     | 2   |     | 1   | 1   |
| <i>Rhizophagus cribratus</i>      | Monotomidae      | 2,7 | P   | 4   |     | 2   |     | 1   |
| <i>Rhizophagus depressus</i>      | Monotomidae      | 2,0 | P   |     |     |     |     | 1   |
| <i>Rhizophagus fenestralis</i>    | Monotomidae      |     | P   | 36  | 40  | 100 | 47  | 17  |
| <i>Rhizophagus ferrugineus</i>    | Monotomidae      | 2,0 | P   | 3   | 3   | 7   |     | 17  |
| <i>Rhizophagus grandis</i> (NT)   | Monotomidae      | 2,0 | P   |     |     |     | 1   |     |
| <i>Rhizophagus nitidulus</i>      | Monotomidae      | 2,8 | P   | 2   | 5   | 33  | 14  | 31  |
| <i>Rhopalodontus strandi</i>      | Ciidae           |     | F   | 3   |     | 3   |     | 1   |
| <i>Rhyncolus ater</i>             | Curculionidae    | 3,0 | W   |     | 2   | 1   |     | 1   |
| <i>Rhyncolus sculpturatus</i>     | Curculionidae    | 3,0 | W   | 5   |     | 1   |     |     |
| <i>Rusticoclytus rusticus</i>     | Cerambycidae     |     | C   | 1   |     |     |     |     |
| <i>Salpingus ruficollis</i>       | Salpingidae      | 2,3 | P   | 2   | 11  | 8   | 11  | 17  |
| <i>Schizotus pectinicornis</i>    | Pyrochroidae     | 2,5 | C   |     | 1   |     |     |     |
| <i>Scolytus ratzeburgii</i>       | Curculionidae    |     | C   | 14  |     |     |     |     |
| <i>Serropalpus barbatus</i>       | Melandryidae     | 2,3 | W   |     |     |     |     | 1   |
| <i>Silvanoprus fagi</i>           | Silvanidae       | 2,0 | P   | 4   | 1   | 3   | 1   | 2   |
| <i>Soronia grisea</i>             | Nitidulidae      |     | D   | 3   | 1   |     |     |     |
| <i>Sphaeriestes stockmanni</i>    | Salpingidae      | 2,0 | P   | 1   |     |     |     |     |
| <i>Stenotrachelus aeneus</i>      | Stenotrachelidae | 2,8 | C   | 19  |     | 1   |     | 2   |
| <i>Stenurella melanura</i>        | Cerambycidae     | 3,4 | W   | 8   |     |     |     |     |
| <i>Stictoleptura maculicornis</i> | Cerambycidae     |     | D,W | 1   |     |     |     |     |
| <i>Sulcaxis fronticornis</i>      | Ciidae           | 3,4 | F   | 4   | 2   |     |     |     |
| <i>Sulcaxis nitidus</i>           | Ciidae           |     | F   | 7   |     |     | 4   |     |
| <i>Synchita humeralis</i>         | Colydiidae       | 3,3 | F   |     | 1   |     |     |     |
| <i>Tachyta nana</i>               | Carabidae        | 2,8 | P   | 9   |     |     |     |     |
| <i>Tetratoma ancora</i>           | Tetratomidae     | 3,0 | F   |     | 2   | 1   | 1   | 1   |
| <i>Tetropium castaneum</i>        | Cerambycidae     | 2,0 | C   | 6   | 2   | 4   | 1   | 8   |
| <i>Tetropium fuscum</i>           | Cerambycidae     | 2,0 | C   | 1   |     |     |     | 2   |
| <i>Thanasimus femoralis</i>       | Cleridae         | 2,3 | P   |     |     | 1   | 1   |     |
| <i>Thanasimus formicarius</i>     | Cleridae         | 2,3 | P   | 1   |     |     |     |     |
| <i>Thiasophila wockii</i>         | Staphylinidae    |     | P   |     |     | 1   | 1   | 1   |
| <i>Tomoxia bucephala</i>          | Mordellidae      | 3,0 | W   | 1   |     |     |     |     |
| <i>Trichius fasciatus</i>         | Scarabaeidae     | 3,5 | W   | 2   |     |     |     |     |
| <i>Triplax aenea</i>              | Erotylidae       | 3,4 | F   | 9   | 12  | 11  | 15  | 6   |
| <i>Triplax russica</i>            | Erotylidae       | 3,4 | F   | 15  | 1   | 3   |     |     |
| <i>Triplax scutellaris</i>        | Erotylidae       | 3,4 | F   | 1   | 10  | 22  | 41  | 18  |
| <i>Trypodendron domesticum</i>    | Curculionidae    |     | F   |     | 1   | 3   | 1   |     |
| <i>Trypodendron laeve</i>         | Curculionidae    |     | F   |     | 16  | 7   | 12  | 3   |
| <i>Trypodendron lineatum</i>      | Curculionidae    |     | F   | 5   | 75  | 126 | 115 | 154 |
| <i>Trypophloeus bispinulus</i>    | Curculionidae    |     | C   | 1   |     |     |     |     |
| <i>Wanachia triguttata</i>        | Melandryidae     |     | F   | 8   |     |     |     |     |
| <i>Xylechinus pilosus</i>         | Curculionidae    | 2,0 | C   |     |     | 6   | 3   | 5   |
| <i>Xylita laevigata</i>           | Melandryidae     | 3,5 | F   | 10  | 12  | 26  | 4   | 20  |
